# Supplementary material for: Interferon-Inducible E3 Ligase RNF213 Facilitates Host-Protective Linear and K63-Linked Ubiquitylation of Toxoplasma gondii Parasitophorous Vacuoles
Source: PubMed Central journal article supplement (PMC9601232; doi:10.1128/mbio.01888-22), 2022-09-26
Supplement: mbio.01888-22-s0001.pdf [file mbio.01888-22-s0001.pdf]

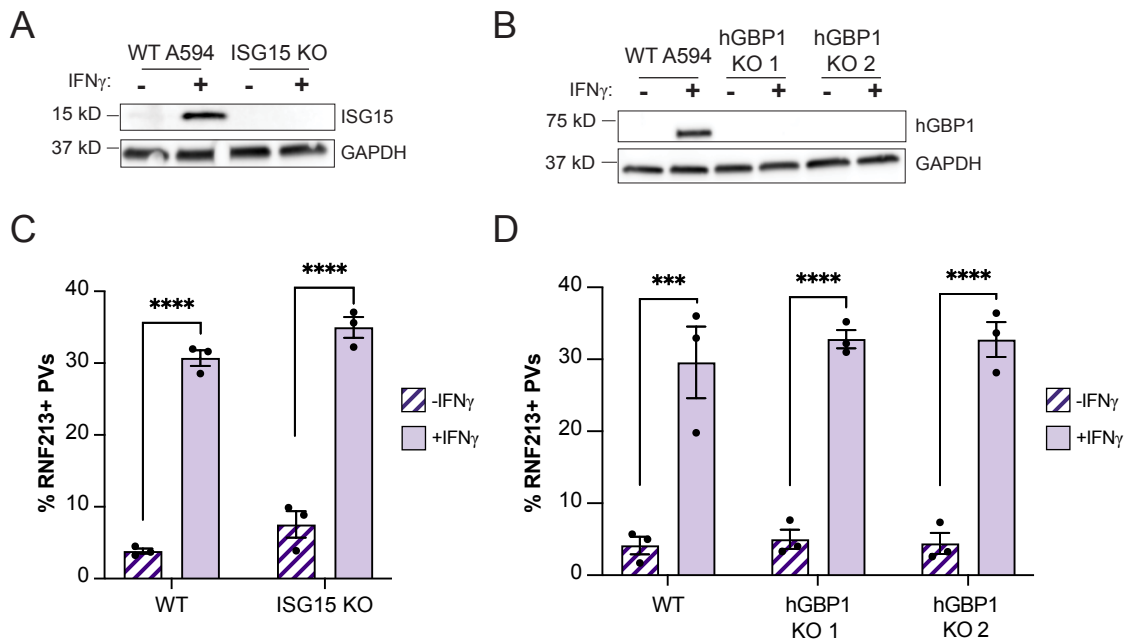

**Fig. S1. RNF213 is recruited to Toxoplasma PVs independent of ISG15 and GBP1.** (A-B) Western blotting for ISG15 and GBP1 protein expression in unprimed and IFN $\gamma$ -primed (100 U/mL) WT, ISG15 KO, and GBP1 KO A549 cells. (C-D) Unprimed and IFN $\gamma$ -primed (100 U/ mL) WT, ISG15 KO, and GBP1 KO A549 cells were infected with Toxoplasma type II Pru at an MOI of 3 and RNF213 recruitment to Toxoplasma PVs was quantified at 6 hpi. All data depict the mean  $\pm$  SEM from 3 independent experiments. 2-way ANOVA followed by Tukey's multiple comparison test was used to determine significance. \* =  $p < 0.05$ , \*\* =  $p < 0.01$ , \*\*\* =  $p < 0.001$ , \*\*\*\* =  $p < 0.0001$ ; n.s. = not significant.
