# Supplementary material for: Interferon-Inducible E3 Ligase RNF213 Facilitates Host-Protective Linear and K63-Linked Ubiquitylation of Toxoplasma gondii Parasitophorous Vacuoles
Source: PubMed Central journal article supplement (PMC9601232; doi:10.1128/mbio.01888-22), 2022-09-26
Supplement: mbio.01888-22-s0002.pdf [file mbio.01888-22-s0002.pdf]

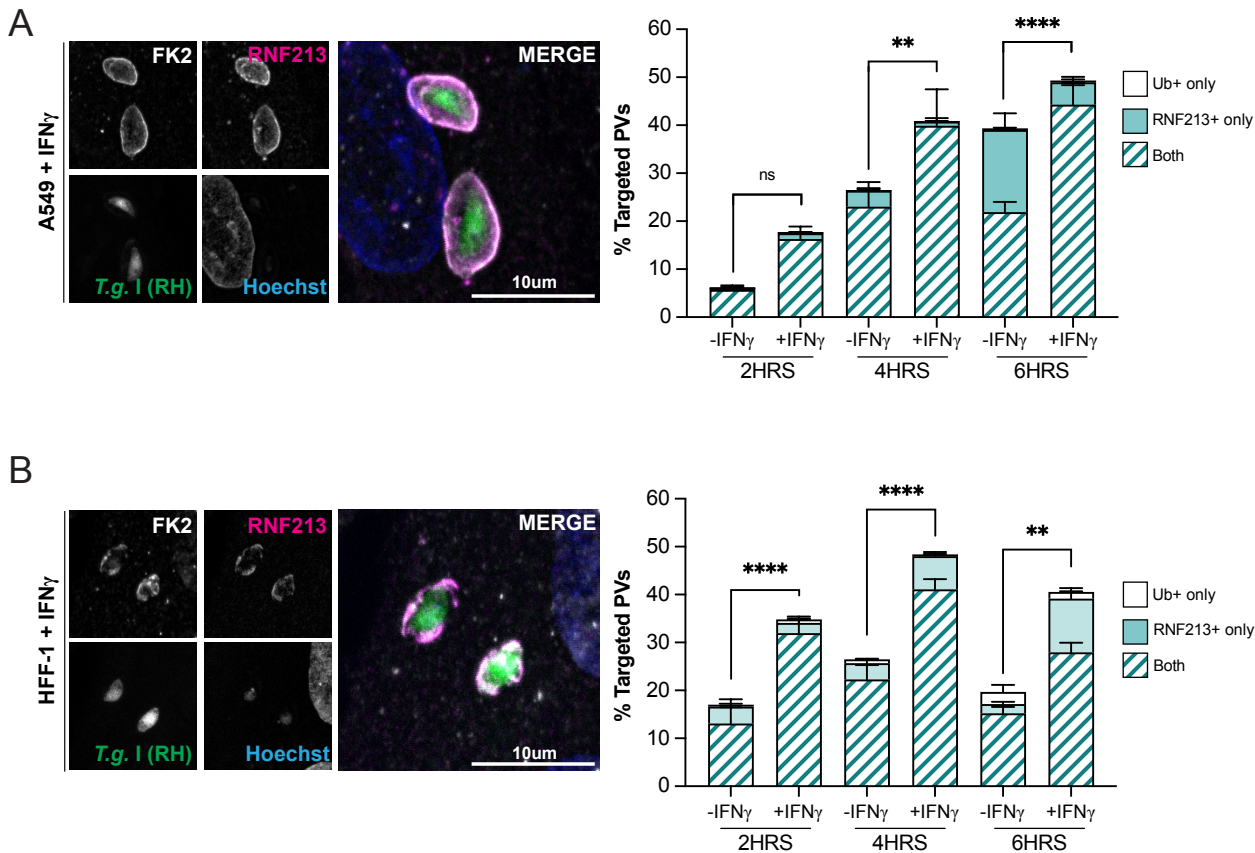

**Fig. S2. RNF213 co-localizes with ubiquitin on Toxoplasma RH PVs.** Unprimed and IFN $\gamma$ -primed (100 U/mL) WT A549 (**A**) and HFF-1 (**B**) cells were infected with Toxoplasma Type I (RH) at an MOI of 3 and RNF213 recruitment to PVs and co-localization with ubiquitin (FK2) was quantified at 2 hpi, 4 hpi, and 6 hpi. Statistical comparisons is shown for groups "Both". Representative confocal images at 6 hpi are shown. All data depict the mean  $\pm$  SEM from 3-4 independent experiments. 2-way ANOVA followed by Tukey's multiple comparison test was used to determine significance. \* =  $p < 0.05$ , \*\* =  $p < 0.01$ , \*\*\* =  $p < 0.001$ , \*\*\*\* =  $p < 0.0001$ ; n.s. = not significant.
