# Supplementary material for: Interferon-Inducible E3 Ligase RNF213 Facilitates Host-Protective Linear and K63-Linked Ubiquitylation of Toxoplasma gondii Parasitophorous Vacuoles
Source: PubMed Central journal article supplement (PMC9601232; doi:10.1128/mbio.01888-22), 2022-09-26
Supplement: mbio.01888-22-s0003.pdf [file mbio.01888-22-s0003.pdf]

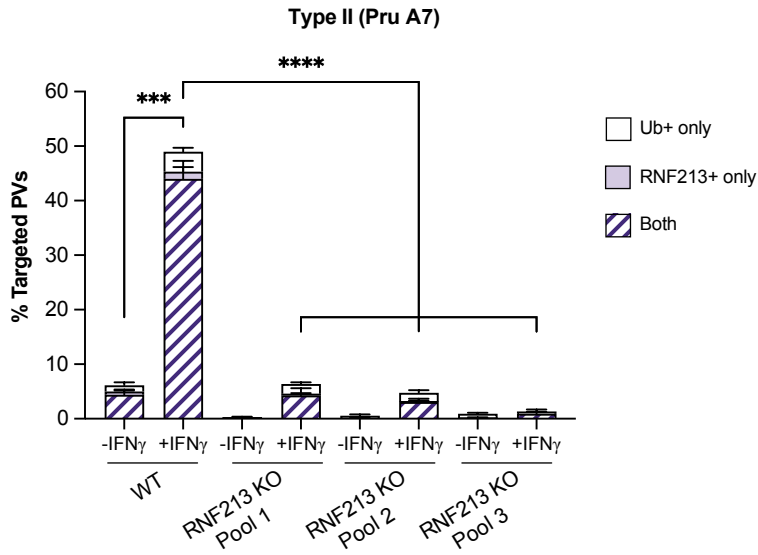

**Fig. S3. Residual RNF213 co-localizes with ubiquitin in RNF213 KO pools.** Unstimulated or IFN $\gamma$ -primed (100 U/mL) WT cells and RNF213 KO pools cells were infected with T.g. Type II (Pru) at an MOI of 3. RNF213 recruitment to the PV and ubiquitin (FK2) co-localization was quantified at 6 hpi. Statistical comparisons is shown for groups "Both". All data depict the mean  $\pm$  SEM from 3 independent experiments. 2-way ANOVA followed by Tukey's multiple comparison test was used to determine significance. 2-way ANOVA followed by Tukey's multiple comparison test was used to determine significance. \* =  $p < 0.05$ , \*\* =  $p < 0.01$ , \*\*\* =  $p < 0.001$ , \*\*\*\* =  $p < 0.0001$ ; n.s. = not signifi-
