# Supplementary material for: Interferon-Inducible E3 Ligase RNF213 Facilitates Host-Protective Linear and K63-Linked Ubiquitylation of Toxoplasma gondii Parasitophorous Vacuoles
Source: PubMed Central journal article supplement (PMC9601232; doi:10.1128/mbio.01888-22), 2022-09-26
Supplement: mbio.01888-22-s0004.pdf [file mbio.01888-22-s0004.pdf]

A

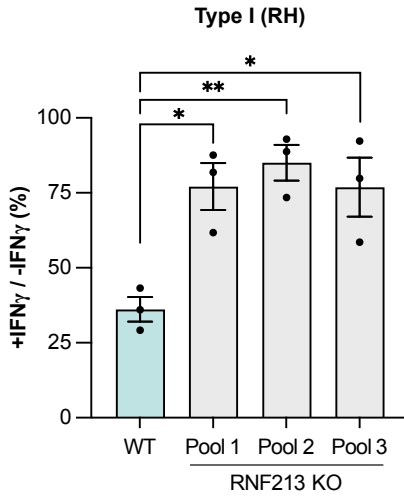

B

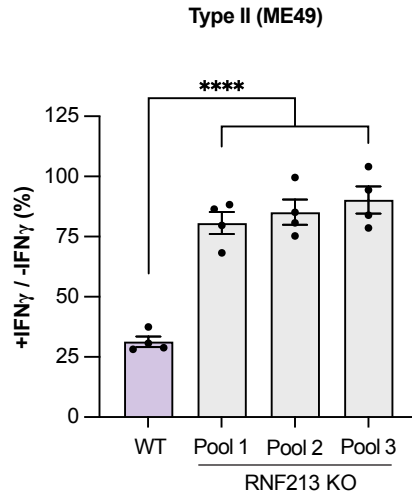

**Fig. S4. RNF213 mediates restriction of *Toxoplasma* type I RH and type II Me49.** Unprimed and IFN $\gamma$ -primed (100 U/mL) WT and RNF213 KO A549 cells were infected with luciferase expressing strains RH (**A**) and Me49 (**B**) at an MOI of 1 or MOI of 2, respectively, and cell lysates were analyzed for luciferase activity at 24 hpi. Growth of each strain in IFN $\gamma$ -primed cells is normalized to growth in unprimed cells. All data depict the mean  $\pm$  SEM from 3-4 independent experiments. One-way ANOVA followed by Tukey's multiple comparison test was used to determine significance. \* =  $p < 0.05$ , \*\* =  $p < 0.01$ , \*\*\* =  $p < 0.001$ , \*\*\*\* =  $p < 0.0001$ ; n.s. = not significant.
